# Supplementary material
Source: publisher figshare collection journal article supplement (https://geolsoc.figshare.com/ndownloader/files/17992244)
Supplement: Supplementary file 1 [file 17992244]

**Table S4**. *Carbon and oxygen isotope composition of diageneticaly altered portions of ammonite shells from the Bathonian of the Saratov region (Sokur) and Tithonian*

*of Samara (Maryevka-1, Molokan pier, Zavodskoj ) and Moscow (Ramenskij) regions. H – height of the shell or whorl height*

| **Sample** | **Shell** | **Species (locality,, zone) (zone)** | **Location**  **(H, in mm)** | **Diagenetic alterations** | | | | **d13C**  **(VPDB)**  **‰** | **d18O**  **(VPDB)**  **‰** | **“T”, oC** |
| --- | --- | --- | --- | --- | --- | --- | --- | --- | --- | --- |
| **Diagenetic**  **stage** | **Aragonite**  **(calcite)**  **%** | **Admixt.**  **(a-SiO2** | **Colour** |
| **764-1** | 764 | *Orniceras besnosovi* Mitta et Seltzer (Sokur, *besnosovi* Zone) | H = 25.4 | - | Present | a-SiO2  (small  portion)  and  chlorite-  clayey  material | Light-cream | 3.3 | -5.3 | 38.6? |
| **Ga-1 -1** | Ga-1 | *Garnjericeras catenulatum*  (Fischer) (Ramenskij,  upper Volgian,  *catenulstum* Zone) | H = 16.5 | 4 | Carbonate | a-SiO2  (traces),  gypsum  and  apatite  minerals  (much) | White | - | - | - |
| **Ga-2-1** | Ga-2 | *Garnjericeras catenulatum*  (Fischer) (Ramenskij,  upper Volgian, *catenulstum* Zone) | H = 16.5 | 4 | Carbonate | a-SiO2  (traces),  gypsum  and  apatite  minerals  (much) | White | - | - | - |
| **Ga-5-1** | Ga-5 | *Garnjericeras catenulatum*  (Fischer) (Ramenskij,  upper Volgian,  *catenulstum* Zone) | H = 40.5 | 4 | Carbonate | a-SiO2  (traces),  gypsum  and  apatite  minerals  (much) | White | - | - | - |
| **Ga-9-1** | Ga-9 | *Garnjericeras catenulatum*  (Fischer) (Ramenskij,  upper Volgian,  *catenulstum* Zone) | H = 22-0 | 4 | Carbonate | a-SiO2  (traces),  gypsum  and  apatite  minerals  (much) | White | - | - | - |
| **Ga-9-2** | Same | *Garnjericeras catenulatum*  (Fischer) (Ramenskij,  upper Volgian,  *catenulstum* Zone) | H = 29.0 | 4 | Carbonate | a-SiO2  (traces),  gypsum  and  apatite  minerals  (much) | White | - | - | - |
| **17-1/345-1** | 17-1/345 | Undetermined ammonite  (Maryevka-1, upper Volgian, *nodiger* Zone) | H = 28.5 | 4 | Aragonite | a-SiO2  (traces),  gypsum  and  apatite  minerals | White | -6.2 | -5.4 | 39.0? |
| **13-1/530-1** | 13-1/530 | Undetermined ammonite  (Molokan, upper Volgian, *nodiger* Zone) | H = 16 | 4 | Aragonite | Apatite | Cream | -6.7 | -6.6 | 44.1? |
| **13-1/534-1** | 13-1/534-1 | Undetermined ammonite  (Molokan, upper Volgian, *nodiger* Zone) | H = 7.3 | 4 | Aragonite | Apatite | Silver- white | -8.7 | -8.1 | 50.4? |
| **11-1/544-1** | 11-1/544 | Undetermined ammonite  (Zavodskoj, upper Volgian, *nodiger* Zone) | H =16.0 | 4 | Aragonite | Apatite | Cream | -7.7 | -8.6 | - |
| **10-1/538-1** | 10-1/538 | *Sinzovia* sp (Agrofenovka, lower Aptian, *volgensis*  Zone). | 7.0 | - | - | - | Siveri-  white | -4.5 | -4.2 | 33.5? |
| **10-1/538-2** | Same shell | Same | >11.0 | - | -- | - | Silveri-  white | -4.6 | -4.2 | 33.5? |
| **10-1/538-3** | Same shell | Same | >14.0 | 4 | Arogonite | α-SiO2,  calcite,  hypsum | Silveri-  white | -3.5 | -3.9 | 32.3? |
| **10-1538-4** | Same shell | Same | >17.0 | 4 | Aragonite | α-SiO2,  calcite,  hypsum | Silveri-  white | -3.5 | -3.8 | 31.9? |
| **7-1/188-1** | 7-1/188 | *Sinzovia* sp (Shirokij Buerak, lower Aptian, *volgensis*  Zone). | 18.0 | - | 85 | No | White | -2.7 | -3.4 | 30.2? |
| **7-1/188-2** | Same shell | Same | 11.0 | - | - | - | White | -5.4 | -3.6 | 31.0? |
| **7-1/206-1** | 7-1/206 | *Deshayesi* sp. *volgensis*  Sazonova (Shirokij Buerak, lower Aptian,,  *volgensis* Zone | 22.0 | - | - | - | Cream | -4.2 | -4.99 | 32.7? |
| **7-1/224-2** | 7-1/224 | *Deshayesi* sp.(Shirokij Buerak, lower Aptian,,  *volgensis* Zone | 9.7 | - | - | - | Cream | -4.4 | -3.0 | 28.5?+ |
| **8-1/282-1** | 8-1/282 | *Cinula* (*Ccringinella*) *obtuse* Natsky (Shirokij Buerak, lower Aptian, ?*tenuicostatus*  Zone). | 13.0 | 2 | 77 | α-SiO2,  (traces) | Creem | -5.8 | -3.5 | 30.1? |
